# Supplementary material for: IR-High resolution spectroscopy of the N2O dimer: The torsional modeElectronic supplementary information (ESI) available: List of measured rotational transitions and assignments. See http://www.rsc.org/suppdata/cp/b3/b300733m/
Source: Royal Society of Chemistry journal article supplement (doi:10.1039/b300733m), 2003-01-01
Supplement: table.pdf [file table.pdf]

## Appendix A

| J' | K' <sub>a</sub> | K' <sub>c</sub> | J'' | K'' <sub>a</sub> | K'' <sub>c</sub> | Obs. [cm <sup>-1</sup> ] | Obs.-Calc. [cm <sup>-1</sup> ] |
|----|-----------------|-----------------|-----|------------------|------------------|--------------------------|--------------------------------|
| 7  | 6               | 1               | 7   | 7                | 0                | 2244,627                 | -0,0007                        |
| 10 | 6               | 4               | 10  | 7                | 3                | 2244,5962                | 0,0012                         |
| 13 | 6               | 7               | 13  | 7                | 6                | 2244,5403                | 0,0008                         |
| 14 | 6               | 8               | 14  | 7                | 7                | 2244,5154                | 0,0010                         |
| 7  | 6               | 2               | 7   | 7                | 1                | 2244,627                 | -0,0007                        |
| 10 | 6               | 5               | 10  | 7                | 4                | 2244,5962                | 0,0012                         |
| 13 | 6               | 8               | 13  | 7                | 7                | 2244,5403                | 0,0008                         |
| 14 | 6               | 9               | 14  | 7                | 8                | 2244,5154                | 0,0010                         |
| 5  | 5               | 0               | 6   | 6                | 1                | 2244,4653                | -0,0002                        |
| 5  | 5               | 1               | 6   | 6                | 0                | 2244,4653                | -0,0002                        |
| 6  | 5               | 1               | 6   | 6                | 0                | 2245,1304                | 0,0015                         |
| 8  | 5               | 3               | 8   | 6                | 2                | 2245,1165                | -0,0014                        |
| 9  | 5               | 4               | 9   | 6                | 3                | 2245,1094                | -0,0006                        |
| 10 | 5               | 5               | 10  | 6                | 4                | 2245,0991                | -0,0011                        |
| 6  | 5               | 0               | 6   | 6                | 1                | 2245,1304                | 0,0015                         |
| 8  | 5               | 2               | 8   | 6                | 3                | 2245,1165                | -0,0014                        |
| 9  | 5               | 3               | 9   | 6                | 4                | 2245,1094                | -0,0006                        |
| 10 | 5               | 4               | 10  | 6                | 5                | 2245,0991                | -0,0011                        |
| 5  | 4               | 1               | 6   | 5                | 2                | 2244,9585                | -0,0006                        |
| 6  | 4               | 2               | 7   | 5                | 3                | 2244,8452                | 0,0012                         |
| 7  | 4               | 3               | 8   | 5                | 4                | 2244,727                 | 0,0001                         |
| 9  | 4               | 5               | 10  | 5                | 6                | 2244,4858                | 0,0005                         |
| 5  | 4               | 2               | 6   | 5                | 1                | 2244,9585                | -0,0006                        |
| 6  | 4               | 3               | 7   | 5                | 2                | 2244,8452                | 0,0012                         |
| 7  | 4               | 4               | 8   | 5                | 3                | 2244,727                 | 0,0001                         |
| 9  | 4               | 6               | 10  | 5                | 5                | 2244,4878                | 0,0025                         |
| 5  | 4               | 1               | 5   | 5                | 0                | 2245,6226                | -0,0015                        |
| 6  | 4               | 2               | 6   | 5                | 1                | 2245,6226                | 0,0005                         |
| 7  | 4               | 3               | 7   | 5                | 2                | 2245,618                 | -0,0012                        |
| 8  | 4               | 4               | 8   | 5                | 3                | 2245,616                 | 0,0009                         |
| 9  | 4               | 5               | 9   | 5                | 4                | 2245,6108                | 0,0013                         |
| 10 | 4               | 6               | 10  | 5                | 5                | 2245,6016                | -0,0005                        |
| 11 | 4               | 7               | 11  | 5                | 6                | 2245,5947                | 0,0021                         |
| 5  | 4               | 1               | 5   | 5                | 0                | 2245,6226                | -0,0015                        |
| 6  | 4               | 2               | 6   | 5                | 1                | 2245,6226                | 0,0005                         |
| 7  | 4               | 3               | 7   | 5                | 2                | 2245,618                 | -0,0012                        |
| 8  | 4               | 4               | 8   | 5                | 3                | 2245,616                 | 0,0009                         |
| 9  | 4               | 5               | 9   | 5                | 4                | 2245,6108                | 0,0013                         |
| 10 | 4               | 6               | 10  | 5                | 5                | 2245,6016                | -0,0005                        |
| 11 | 4               | 7               | 11  | 5                | 6                | 2245,5947                | 0,0021                         |
| 6  | 3               | 3               | 7   | 4                | 4                | 2245,3364                | -0,0016                        |
| 8  | 3               | 5               | 9   | 4                | 6                | 2245,1033                | -0,0013                        |
| 9  | 3               | 6               | 10  | 4                | 7                | 2244,9846                | 0,0006                         |
| 10 | 3               | 7               | 11  | 4                | 8                | 2244,8613                | 0,0010                         |
| 11 | 3               | 8               | 12  | 4                | 9                | 2244,7332                | 0,0003                         |
| 6  | 3               | 4               | 7   | 4                | 3                | 2245,3364                | -0,0015                        |
| 8  | 3               | 6               | 9   | 4                | 5                | 2245,1033                | -0,0008                        |
| 9  | 3               | 7               | 10  | 4                | 6                | 2244,9846                | 0,0015                         |
| 10 | 3               | 8               | 11  | 4                | 7                | 2244,8613                | 0,0027                         |
| 11 | 3               | 9               | 12  | 4                | 8                | 2244,7295                | -0,0006                        |
| 4  | 3               | 1               | 4   | 4                | 0                | 2246,1145                | -0,0009                        |
| 5  | 3               | 2               | 5   | 4                | 1                | 2246,1145                | -0,0007                        |
| 6  | 3               | 3               | 6   | 4                | 2                | 2246,1145                | 0,0000                         |
| 7  | 3               | 4               | 7   | 4                | 3                | 2246,1145                | 0,0016                         |
| 8  | 3               | 5               | 8   | 4                | 4                | 2246,1108                | 0,0005                         |
| 9  | 3               | 6               | 9   | 4                | 5                | 2246,105                 | -0,0011                        |

|    |   |    |    |   |    |           |         |
|----|---|----|----|---|----|-----------|---------|
| 10 | 3 | 7  | 10 | 4 | 6  | 2246,1011 | 0,0010  |
| 11 | 3 | 8  | 11 | 4 | 7  | 2246,0925 | 0,0007  |
| 12 | 3 | 9  | 12 | 4 | 8  | 2246,0818 | 0,0010  |
| 14 | 3 | 11 | 14 | 4 | 10 | 2246,0488 | 0,0005  |
| 4  | 3 | 2  | 4  | 4 | 1  | 2246,1145 | -0,0009 |
| 5  | 3 | 3  | 5  | 4 | 2  | 2246,1145 | -0,0007 |
| 6  | 3 | 4  | 6  | 4 | 3  | 2246,1145 | 0,0000  |
| 7  | 3 | 5  | 7  | 4 | 4  | 2246,1145 | 0,0016  |
| 8  | 3 | 6  | 8  | 4 | 5  | 2246,1108 | 0,0007  |
| 9  | 3 | 7  | 9  | 4 | 6  | 2246,105  | -0,0009 |
| 10 | 3 | 8  | 10 | 4 | 7  | 2246,1011 | 0,0012  |
| 11 | 3 | 9  | 11 | 4 | 8  | 2246,0925 | 0,0008  |
| 12 | 3 | 10 | 12 | 4 | 9  | 2246,0818 | 0,0008  |
| 14 | 3 | 12 | 14 | 4 | 11 | 2246,0513 | 0,0000  |
| 4  | 2 | 2  | 5  | 3 | 3  | 2246,0564 | 0,0019  |
| 6  | 2 | 4  | 7  | 3 | 5  | 2245,8281 | -0,0018 |
| 7  | 2 | 5  | 8  | 3 | 6  | 2245,7139 | -0,0010 |
| 4  | 2 | 3  | 5  | 3 | 2  | 2246,0564 | 0,0020  |
| 6  | 2 | 5  | 7  | 3 | 4  | 2245,8281 | -0,0012 |
| 7  | 2 | 6  | 8  | 3 | 5  | 2245,7139 | 0,0004  |
| 11 | 2 | 10 | 12 | 3 | 9  | 2245,2158 | 0,0025  |
| 3  | 0 | 3  | 3  | 1 | 2  | 2247,5518 | -0,0008 |
| 8  | 0 | 8  | 8  | 1 | 7  | 2247,4292 | 0,0000  |
| 2  | 1 | 1  | 2  | 2 | 0  | 2247,0869 | -0,0013 |
| 3  | 1 | 2  | 3  | 2 | 1  | 2247,0862 | 0,0019  |
| 4  | 1 | 3  | 4  | 2 | 2  | 2247,0791 | 0,0012  |
| 5  | 1 | 4  | 5  | 2 | 3  | 2247,0708 | 0,0026  |
| 6  | 1 | 5  | 6  | 2 | 4  | 2247,0564 | 0,0022  |
| 7  | 1 | 6  | 7  | 2 | 5  | 2247,0361 | 0,0010  |
| 5  | 1 | 5  | 5  | 2 | 4  | 2247,1177 | -0,0012 |
| 6  | 1 | 6  | 6  | 2 | 5  | 2247,127  | -0,0022 |
| 7  | 1 | 7  | 7  | 2 | 6  | 2247,1409 | 0,0001  |
| 8  | 1 | 8  | 8  | 2 | 7  | 2247,1526 | -0,0008 |
| 9  | 1 | 9  | 9  | 2 | 8  | 2247,1643 | -0,0022 |
| 10 | 1 | 10 | 10 | 2 | 9  | 2247,1794 | -0,0005 |
| 11 | 1 | 11 | 11 | 2 | 10 | 2247,1929 | 0,0001  |
| 3  | 3 | 0  | 3  | 2 | 1  | 2249,0535 | 0,0012  |
| 4  | 3 | 1  | 4  | 2 | 2  | 2249,0503 | -0,0010 |
| 5  | 3 | 2  | 5  | 2 | 3  | 2249,0503 | 0,0024  |
| 6  | 3 | 3  | 6  | 2 | 4  | 2249,042  | 0,0012  |
| 7  | 3 | 4  | 7  | 2 | 5  | 2249,0312 | 0,0023  |
| 8  | 3 | 5  | 8  | 2 | 6  | 2249,0144 | 0,0031  |
| 9  | 3 | 6  | 9  | 2 | 7  | 2248,9888 | 0,0016  |
| 3  | 3 | 1  | 3  | 2 | 2  | 2249,0535 | -0,0007 |
| 4  | 3 | 2  | 4  | 2 | 3  | 2249,0576 | 0,0009  |
| 5  | 3 | 3  | 5  | 2 | 4  | 2249,0613 | 0,0012  |
| 6  | 3 | 4  | 6  | 2 | 5  | 2249,0642 | -0,0004 |
| 7  | 3 | 5  | 7  | 2 | 6  | 2249,0706 | 0,0002  |
| 8  | 3 | 6  | 8  | 2 | 7  | 2249,075  | -0,0025 |
| 9  | 3 | 7  | 9  | 2 | 8  | 2249,0863 | 0,0003  |
| 10 | 3 | 8  | 10 | 2 | 9  | 2249,0959 | -0,0002 |
| 11 | 3 | 9  | 11 | 2 | 10 | 2249,1062 | -0,0015 |
| 12 | 3 | 10 | 12 | 2 | 11 | 2249,1218 | 0,0011  |
| 3  | 2 | 1  | 3  | 3 | 0  | 2246,6057 | 0,0012  |
| 4  | 2 | 2  | 4  | 3 | 1  | 2246,6057 | 0,0006  |
| 5  | 2 | 3  | 5  | 3 | 2  | 2246,6057 | 0,0003  |
| 6  | 2 | 4  | 6  | 3 | 3  | 2246,6057 | 0,0010  |
| 7  | 2 | 5  | 7  | 3 | 4  | 2246,602  | -0,0006 |
| 8  | 2 | 6  | 8  | 3 | 5  | 2246,5974 | -0,0008 |

|    |    |   |    |    |   |           |         |
|----|----|---|----|----|---|-----------|---------|
| 9  | 2  | 7 | 9  | 3  | 6 | 2246,5911 | 0,0005  |
| 10 | 2  | 8 | 10 | 3  | 7 | 2246,5774 | -0,0015 |
| 2  | 2  | 1 | 3  | 1  | 2 | 2248,2058 | 0,0030  |
| 4  | 2  | 3 | 5  | 1  | 4 | 2247,9446 | 0,0020  |
| 8  | 3  | 6 | 9  | 2  | 7 | 2247,9844 | -0,0008 |
| 9  | 3  | 7 | 10 | 2  | 8 | 2247,8373 | -0,0022 |
| 10 | 3  | 8 | 11 | 2  | 9 | 2247,6785 | -0,0076 |
| 4  | 4  | 1 | 5  | 3  | 2 | 2248,9937 | -0,0003 |
| 5  | 4  | 2 | 6  | 3  | 3 | 2248,8845 | 0,0021  |
| 5  | 5  | 1 | 6  | 4  | 2 | 2249,3728 | 0,0015  |
| 7  | 5  | 3 | 8  | 4  | 4 | 2249,1433 | 0,0001  |
| 8  | 5  | 4 | 9  | 4  | 5 | 2249,0244 | -0,0016 |
| 9  | 6  | 4 | 10 | 5  | 5 | 2249,3889 | 0,0007  |
| 10 | 6  | 5 | 11 | 5  | 6 | 2249,2637 | -0,0004 |
| 11 | 6  | 6 | 12 | 5  | 7 | 2249,1367 | 0,0003  |
| 12 | 6  | 7 | 13 | 5  | 8 | 2249,0039 | -0,0007 |
| 8  | 7  | 2 | 9  | 6  | 3 | 2249,9901 | 0,0013  |
| 10 | 7  | 4 | 11 | 6  | 5 | 2249,741  | 0,0019  |
| 8  | 8  | 1 | 9  | 7  | 2 | 2250,4658 | 0,0006  |
| 10 | 8  | 3 | 11 | 7  | 4 | 2250,2092 | 0,0000  |
| 11 | 8  | 4 | 12 | 7  | 5 | 2250,0754 | -0,0002 |
| 12 | 8  | 5 | 13 | 7  | 6 | 2249,9395 | 0,0019  |
| 11 | 9  | 3 | 12 | 8  | 4 | 2250,5366 | -0,0003 |
| 12 | 9  | 4 | 13 | 8  | 5 | 2250,3945 | 0,0001  |
| 13 | 9  | 5 | 14 | 8  | 6 | 2250,2488 | 0,0021  |
| 10 | 10 | 1 | 11 | 9  | 2 | 2251,136  | -0,0001 |
| 11 | 11 | 1 | 12 | 10 | 2 | 2251,4434 | -0,0007 |
| 2  | 0  | 2 | 1  | 1  | 1 | 2247,8044 | -0,0016 |
| 3  | 0  | 3 | 2  | 1  | 2 | 2247,9287 | 0,0009  |
| 4  | 0  | 4 | 3  | 1  | 3 | 2248,054  | -0,0018 |
| 5  | 0  | 5 | 4  | 1  | 4 | 2248,1887 | -0,0013 |
| 3  | 1  | 2 | 2  | 2  | 1 | 2247,4155 | 0,0012  |
| 7  | 1  | 6 | 6  | 2  | 5 | 2247,8467 | 0,0008  |
| 10 | 1  | 9 | 9  | 2  | 8 | 2248,1885 | -0,0025 |
| 4  | 2  | 2 | 3  | 3  | 1 | 2247,043  | -0,0017 |
| 5  | 2  | 3 | 4  | 3  | 2 | 2247,1575 | 0,0012  |
| 7  | 2  | 5 | 6  | 3  | 4 | 2247,3792 | -0,0005 |
| 9  | 2  | 7 | 8  | 3  | 6 | 2247,6001 | -0,0016 |
| 5  | 3  | 2 | 4  | 4  | 1 | 2246,6672 | 0,0004  |
| 0  | 0  | 0 | 1  | 1  | 1 | 2247,4756 | -0,0011 |
| 1  | 0  | 1 | 2  | 1  | 2 | 2247,3793 | 0,0007  |
| 2  | 0  | 2 | 3  | 1  | 3 | 2247,2832 | -0,0031 |
| 3  | 0  | 3 | 4  | 1  | 4 | 2247,1975 | -0,0021 |
| 4  | 0  | 4 | 5  | 1  | 5 | 2247,1173 | -0,0009 |
| 6  | 0  | 6 | 7  | 1  | 7 | 2246,9724 | 0,0017  |
| 1  | 1  | 0 | 2  | 2  | 1 | 2246,8716 | -0,0002 |
| 2  | 1  | 1 | 3  | 2  | 2 | 2246,7608 | 0,0003  |
| 3  | 1  | 2 | 4  | 2  | 3 | 2246,6499 | 0,0016  |
| 2  | 1  | 2 | 3  | 2  | 1 | 2246,7666 | -0,0005 |
| 3  | 1  | 3 | 4  | 2  | 2 | 2246,6579 | -0,0015 |
| 5  | 1  | 5 | 6  | 2  | 4 | 2246,4388 | 0,0021  |
| 6  | 1  | 6 | 7  | 2  | 5 | 2246,3179 | -0,0006 |
| 7  | 1  | 7 | 8  | 2  | 6 | 2246,1943 | 0,0006  |
| 1  | 1  | 0 | 2  | 0  | 2 | 2247,8516 | 0,0002  |
| 2  | 1  | 1 | 3  | 0  | 3 | 2247,7432 | 0,0014  |
| 5  | 1  | 4 | 6  | 0  | 6 | 2247,4243 | 0,0013  |
| 6  | 1  | 5 | 7  | 0  | 7 | 2247,3264 | 0,0023  |
| 1  | 1  | 1 | 0  | 0  | 0 | 2248,1804 | -0,0009 |
| 4  | 2  | 3 | 3  | 1  | 2 | 2248,9741 | 0,0011  |

|    |   |   |    |   |   |           |         |
|----|---|---|----|---|---|-----------|---------|
| 6  | 2 | 5 | 5  | 1 | 4 | 2249,1602 | 0,0032  |
| 7  | 2 | 6 | 6  | 1 | 5 | 2249,2461 | 0,0008  |
| 8  | 2 | 7 | 7  | 1 | 6 | 2249,3326 | 0,0002  |
| 9  | 2 | 8 | 8  | 1 | 7 | 2249,4172 | -0,0019 |
| 10 | 2 | 9 | 9  | 1 | 8 | 2249,505  | -0,0015 |
| 3  | 3 | 0 | 2  | 2 | 1 | 2249,3807 | -0,0016 |
| 7  | 3 | 4 | 6  | 2 | 5 | 2249,8374 | -0,0023 |
| 8  | 3 | 5 | 7  | 2 | 6 | 2249,9592 | 0,0008  |
| 3  | 3 | 1 | 2  | 2 | 0 | 2249,3807 | -0,0012 |
| 7  | 3 | 5 | 6  | 2 | 4 | 2249,8157 | 0,0000  |
| 8  | 3 | 6 | 7  | 2 | 5 | 2249,9165 | -0,0001 |
| 4  | 4 | 0 | 4  | 3 | 1 | 2249,5459 | 0,0011  |
| 5  | 4 | 1 | 5  | 3 | 2 | 2249,5459 | 0,0004  |
| 6  | 4 | 2 | 6  | 3 | 3 | 2249,5459 | 0,0004  |
| 7  | 4 | 3 | 7  | 3 | 4 | 2249,5459 | 0,0017  |
| 8  | 4 | 4 | 8  | 3 | 5 | 2249,5413 | 0,0001  |
| 9  | 4 | 5 | 9  | 3 | 6 | 2249,5359 | 0,0001  |
| 10 | 4 | 6 | 10 | 3 | 7 | 2249,5269 | -0,0001 |
| 4  | 4 | 1 | 4  | 3 | 2 | 2249,5459 | 0,0010  |
| 5  | 4 | 2 | 5  | 3 | 3 | 2249,5459 | 0,0002  |
| 6  | 4 | 3 | 6  | 3 | 4 | 2249,5459 | -0,0002 |
| 7  | 4 | 4 | 7  | 3 | 5 | 2249,5459 | 0,0000  |
| 8  | 4 | 5 | 8  | 3 | 6 | 2249,5459 | 0,0011  |
| 9  | 4 | 6 | 9  | 3 | 7 | 2249,5408 | -0,0017 |
| 5  | 4 | 2 | 4  | 3 | 1 | 2250,095  | -0,0013 |
| 6  | 4 | 3 | 5  | 3 | 2 | 2250,2092 | 0,0007  |
| 7  | 4 | 4 | 6  | 3 | 3 | 2250,322  | 0,0013  |
| 9  | 4 | 6 | 8  | 3 | 5 | 2250,5457 | 0,0024  |
| 10 | 4 | 7 | 9  | 3 | 6 | 2250,6529 | 0,0003  |
| 5  | 4 | 1 | 4  | 3 | 2 | 2250,095  | -0,0014 |
| 6  | 4 | 2 | 5  | 3 | 3 | 2250,2092 | 0,0004  |
| 7  | 4 | 3 | 6  | 3 | 4 | 2250,3203 | -0,0011 |
| 9  | 4 | 5 | 8  | 3 | 6 | 2250,5466 | -0,0002 |
| 5  | 5 | 0 | 5  | 4 | 1 | 2250,0337 | -0,0012 |
| 6  | 5 | 1 | 6  | 4 | 2 | 2250,0337 | -0,0011 |
| 7  | 5 | 2 | 7  | 4 | 3 | 2250,0337 | -0,0002 |
| 8  | 5 | 3 | 8  | 4 | 4 | 2250,0303 | -0,0016 |
| 9  | 5 | 4 | 9  | 4 | 5 | 2250,0303 | 0,0018  |
| 10 | 5 | 5 | 10 | 4 | 6 | 2250,0249 | 0,0015  |
| 11 | 5 | 6 | 11 | 4 | 7 | 2250,0183 | 0,0023  |
| 5  | 5 | 1 | 5  | 4 | 2 | 2250,0337 | -0,0012 |
| 6  | 5 | 2 | 6  | 4 | 3 | 2250,0337 | -0,0011 |
| 7  | 5 | 3 | 7  | 4 | 4 | 2250,0337 | -0,0002 |
| 8  | 5 | 4 | 8  | 4 | 5 | 2250,0303 | -0,0017 |
| 9  | 5 | 5 | 9  | 4 | 6 | 2250,0303 | 0,0015  |
| 10 | 5 | 6 | 10 | 4 | 7 | 2250,0249 | 0,0010  |
| 11 | 5 | 7 | 11 | 4 | 8 | 2250,0183 | 0,0013  |
| 5  | 5 | 1 | 4  | 4 | 0 | 2250,5843 | -0,0021 |
| 6  | 6 | 0 | 6  | 5 | 1 | 2250,521  | -0,0010 |
| 7  | 6 | 1 | 7  | 5 | 2 | 2250,521  | 0,0010  |
| 8  | 6 | 2 | 8  | 5 | 3 | 2250,515  | -0,0019 |
| 9  | 6 | 3 | 9  | 5 | 4 | 2250,512  | -0,0005 |
| 10 | 6 | 4 | 10 | 5 | 5 | 2250,5078 | 0,0014  |
| 11 | 6 | 5 | 11 | 5 | 6 | 2250,4973 | -0,0010 |
| 12 | 6 | 6 | 12 | 5 | 7 | 2250,4878 | -0,0001 |
| 13 | 6 | 7 | 13 | 5 | 8 | 2250,4773 | 0,0026  |
| 6  | 6 | 1 | 6  | 5 | 2 | 2250,521  | -0,0010 |
| 7  | 6 | 2 | 7  | 5 | 3 | 2250,521  | 0,0010  |
| 8  | 6 | 3 | 8  | 5 | 4 | 2250,515  | -0,0019 |

|    |   |   |    |   |   |           |         |
|----|---|---|----|---|---|-----------|---------|
| 9  | 6 | 4 | 9  | 5 | 5 | 2250,512  | -0,0005 |
| 10 | 6 | 5 | 10 | 5 | 6 | 2250,5078 | 0,0014  |
| 11 | 6 | 6 | 11 | 5 | 7 | 2250,4973 | -0,0010 |
| 12 | 6 | 7 | 12 | 5 | 8 | 2250,4878 | -0,0001 |
| 13 | 6 | 8 | 13 | 5 | 9 | 2250,4773 | 0,0025  |
| 6  | 6 | 0 | 5  | 5 | 1 | 2251,1887 | 0,0017  |
| 7  | 6 | 1 | 6  | 5 | 2 | 2251,3    | 0,0019  |
| 8  | 6 | 2 | 7  | 5 | 3 | 2251,4109 | 0,0017  |
| 9  | 6 | 3 | 8  | 5 | 4 | 2251,5193 | -0,0008 |
| 10 | 6 | 4 | 9  | 5 | 5 | 2251,6299 | -0,0007 |
| 11 | 6 | 5 | 10 | 5 | 6 | 2251,7399 | -0,0007 |
| 12 | 6 | 6 | 11 | 5 | 7 | 2251,8489 | -0,0009 |
| 13 | 6 | 7 | 12 | 5 | 8 | 2251,9568 | -0,0012 |
| 14 | 6 | 8 | 13 | 5 | 9 | 2252,0648 | -0,0002 |
| 6  | 6 | 1 | 5  | 5 | 0 | 2251,1887 | 0,0017  |
| 7  | 6 | 2 | 6  | 5 | 1 | 2251,3    | 0,0019  |
| 8  | 6 | 3 | 7  | 5 | 2 | 2251,4109 | 0,0017  |
| 9  | 6 | 4 | 8  | 5 | 3 | 2251,5193 | -0,0008 |
| 10 | 6 | 5 | 9  | 5 | 4 | 2251,6299 | -0,0007 |
| 11 | 6 | 6 | 10 | 5 | 5 | 2251,7399 | -0,0007 |
| 12 | 6 | 7 | 11 | 5 | 6 | 2251,8489 | -0,0009 |
| 13 | 6 | 8 | 12 | 5 | 7 | 2251,9568 | -0,0012 |
| 14 | 6 | 9 | 13 | 5 | 8 | 2252,0648 | 0,0000  |
| 7  | 7 | 1 | 6  | 6 | 0 | 2251,7846 | 0,0000  |
| 8  | 7 | 2 | 7  | 6 | 1 | 2251,8945 | 0,0004  |
| 9  | 7 | 3 | 8  | 6 | 2 | 2252,0037 | 0,0005  |
| 7  | 7 | 0 | 6  | 6 | 1 | 2251,7846 | 0,0000  |
| 8  | 7 | 1 | 7  | 6 | 2 | 2251,8945 | 0,0004  |
| 9  | 7 | 2 | 8  | 6 | 3 | 2252,0037 | 0,0005  |
| 9  | 9 | 0 | 9  | 8 | 1 | 2251,9438 | -0,0006 |
| 7  | 7 | 0 | 6  | 6 | 0 | 2251,7846 | 0,0001  |
| 8  | 7 | 1 | 7  | 6 | 1 | 2251,8945 | 0,0004  |
| 9  | 7 | 2 | 8  | 6 | 2 | 2252,0037 | 0,0005  |
| 7  | 7 | 1 | 6  | 6 | 1 | 2251,7846 | -0,0001 |
| 8  | 7 | 2 | 7  | 6 | 2 | 2251,8945 | 0,0004  |
| 9  | 7 | 3 | 8  | 6 | 3 | 2252,0037 | 0,0005  |
| 6  | 6 | 0 | 5  | 5 | 0 | 2251,1887 | 0,0017  |
| 7  | 6 | 1 | 6  | 5 | 1 | 2251,3018 | 0,0037  |
| 8  | 6 | 2 | 7  | 5 | 2 | 2251,4109 | 0,0017  |
| 9  | 6 | 3 | 8  | 5 | 3 | 2251,5193 | -0,0008 |
| 10 | 6 | 4 | 9  | 5 | 4 | 2251,6299 | -0,0007 |
| 11 | 6 | 5 | 10 | 5 | 5 | 2251,7399 | -0,0007 |
| 12 | 6 | 6 | 11 | 5 | 6 | 2251,8489 | -0,0009 |
| 13 | 6 | 7 | 12 | 5 | 7 | 2251,9568 | -0,0012 |
| 14 | 6 | 8 | 13 | 5 | 8 | 2252,0648 | 0,0000  |
| 6  | 6 | 1 | 5  | 5 | 1 | 2251,1887 | 0,0017  |
| 7  | 6 | 2 | 6  | 5 | 2 | 2251,3018 | 0,0037  |
| 8  | 6 | 3 | 7  | 5 | 3 | 2251,4109 | 0,0017  |
| 9  | 6 | 4 | 8  | 5 | 4 | 2251,5193 | -0,0008 |
| 10 | 6 | 5 | 9  | 5 | 5 | 2251,6299 | -0,0007 |
| 11 | 6 | 6 | 10 | 5 | 6 | 2251,7399 | -0,0007 |
| 12 | 6 | 7 | 11 | 5 | 7 | 2251,8489 | -0,0009 |
| 13 | 6 | 8 | 12 | 5 | 8 | 2251,9568 | -0,0012 |
| 14 | 6 | 9 | 13 | 5 | 9 | 2252,0648 | -0,0002 |
| 6  | 6 | 1 | 6  | 5 | 1 | 2250,521  | -0,0010 |
| 7  | 6 | 2 | 7  | 5 | 2 | 2250,521  | 0,0010  |
| 8  | 6 | 3 | 8  | 5 | 3 | 2250,515  | -0,0019 |
| 9  | 6 | 4 | 9  | 5 | 4 | 2250,512  | -0,0005 |
| 10 | 6 | 5 | 10 | 5 | 5 | 2250,5078 | 0,0014  |

|    |   |    |    |   |    |           |         |
|----|---|----|----|---|----|-----------|---------|
| 11 | 6 | 6  | 11 | 5 | 6  | 2250,4973 | -0,0010 |
| 12 | 6 | 7  | 12 | 5 | 7  | 2250,4878 | -0,0001 |
| 13 | 6 | 8  | 13 | 5 | 8  | 2250,4773 | 0,0026  |
| 5  | 4 | 2  | 4  | 3 | 2  | 2250,095  | -0,0014 |
| 6  | 4 | 3  | 5  | 3 | 3  | 2250,2092 | 0,0004  |
| 7  | 4 | 4  | 6  | 3 | 4  | 2250,322  | 0,0006  |
| 9  | 4 | 6  | 8  | 3 | 6  | 2250,5466 | -0,0002 |
| 10 | 4 | 7  | 9  | 3 | 7  | 2250,6606 | 0,0012  |
| 11 | 4 | 8  | 10 | 3 | 8  | 2250,7705 | -0,0013 |
| 5  | 4 | 1  | 4  | 3 | 1  | 2250,095  | -0,0013 |
| 6  | 4 | 2  | 5  | 3 | 2  | 2250,2092 | 0,0007  |
| 7  | 4 | 3  | 6  | 3 | 3  | 2250,3203 | -0,0004 |
| 9  | 4 | 5  | 8  | 3 | 5  | 2250,5457 | 0,0024  |
| 10 | 4 | 6  | 9  | 3 | 6  | 2250,6529 | 0,0003  |
| 11 | 4 | 7  | 10 | 3 | 7  | 2250,7593 | -0,0005 |
| 4  | 4 | 1  | 4  | 3 | 1  | 2249,5459 | 0,0011  |
| 5  | 4 | 2  | 5  | 3 | 2  | 2249,5459 | 0,0004  |
| 6  | 4 | 3  | 6  | 3 | 3  | 2249,5459 | 0,0004  |
| 7  | 4 | 4  | 7  | 3 | 4  | 2249,5459 | 0,0017  |
| 8  | 4 | 5  | 8  | 3 | 5  | 2249,541  | -0,0002 |
| 9  | 4 | 6  | 9  | 3 | 6  | 2249,5359 | 0,0001  |
| 10 | 4 | 7  | 10 | 3 | 7  | 2249,5269 | -0,0001 |
| 3  | 3 | 0  | 2  | 2 | 0  | 2249,3807 | -0,0012 |
| 7  | 3 | 4  | 6  | 2 | 4  | 2249,8157 | -0,0001 |
| 8  | 3 | 5  | 7  | 2 | 5  | 2249,9165 | -0,0004 |
| 3  | 3 | 1  | 2  | 2 | 1  | 2249,3807 | -0,0016 |
| 7  | 3 | 5  | 6  | 2 | 5  | 2249,8374 | -0,0022 |
| 8  | 3 | 6  | 7  | 2 | 6  | 2249,9592 | 0,0010  |
| 9  | 3 | 7  | 8  | 2 | 7  | 2250,0798 | 0,0008  |
| 3  | 2 | 2  | 2  | 1 | 2  | 2248,9079 | 0,0000  |
| 4  | 2 | 3  | 3  | 1 | 3  | 2249,0361 | -0,0003 |
| 5  | 2 | 4  | 4  | 1 | 4  | 2249,1738 | 0,0024  |
| 7  | 2 | 6  | 6  | 1 | 6  | 2249,4639 | 0,0020  |
| 8  | 2 | 7  | 7  | 1 | 7  | 2249,6177 | 0,0002  |
| 9  | 2 | 8  | 8  | 1 | 8  | 2249,7793 | -0,0009 |
| 10 | 2 | 9  | 9  | 1 | 9  | 2249,9478 | -0,0019 |
| 11 | 2 | 10 | 10 | 1 | 10 | 2250,1245 | -0,0014 |
| 5  | 2 | 3  | 4  | 1 | 3  | 2249,0642 | -0,0018 |
| 6  | 2 | 4  | 5  | 1 | 4  | 2249,1562 | 0,0003  |
| 8  | 2 | 6  | 7  | 1 | 6  | 2249,3284 | 0,0002  |
| 9  | 2 | 7  | 8  | 1 | 7  | 2249,4121 | 0,0003  |
| 10 | 2 | 8  | 9  | 1 | 8  | 2249,4935 | -0,0009 |
| 11 | 2 | 9  | 10 | 1 | 9  | 2249,5769 | 0,0002  |
| 1  | 1 | 0  | 0  | 0 | 0  | 2248,1804 | 0,0019  |
| 5  | 5 | 0  | 6  | 6 | 0  | 2244,4653 | -0,0002 |
| 5  | 5 | 1  | 6  | 6 | 1  | 2244,4653 | -0,0002 |
| 5  | 4 | 1  | 6  | 5 | 1  | 2244,9585 | -0,0006 |
| 6  | 4 | 2  | 7  | 5 | 2  | 2244,8452 | 0,0012  |
| 7  | 4 | 3  | 8  | 5 | 3  | 2244,727  | 0,0001  |
| 9  | 4 | 5  | 10 | 5 | 5  | 2244,4858 | 0,0005  |
| 5  | 4 | 2  | 6  | 5 | 2  | 2244,9585 | -0,0006 |
| 6  | 4 | 3  | 7  | 5 | 3  | 2244,8452 | 0,0012  |
| 7  | 4 | 4  | 8  | 5 | 4  | 2244,727  | 0,0001  |
| 9  | 4 | 6  | 10 | 5 | 6  | 2244,4878 | 0,0025  |
| 6  | 3 | 3  | 7  | 4 | 3  | 2245,3364 | -0,0015 |
| 8  | 3 | 5  | 9  | 4 | 5  | 2245,1033 | -0,0011 |
| 9  | 3 | 6  | 10 | 4 | 6  | 2244,9846 | 0,0011  |
| 10 | 3 | 7  | 11 | 4 | 7  | 2244,8613 | 0,0020  |
| 11 | 3 | 8  | 12 | 4 | 8  | 2244,7332 | 0,0020  |

|    |   |    |    |   |    |           |         |
|----|---|----|----|---|----|-----------|---------|
| 6  | 3 | 4  | 7  | 4 | 4  | 2245,3364 | -0,0015 |
| 8  | 3 | 6  | 9  | 4 | 6  | 2245,1033 | -0,0010 |
| 9  | 3 | 7  | 10 | 4 | 7  | 2244,9846 | 0,0010  |
| 10 | 3 | 8  | 11 | 4 | 8  | 2244,8613 | 0,0017  |
| 11 | 3 | 9  | 12 | 4 | 9  | 2244,7295 | -0,0023 |
| 4  | 2 | 2  | 5  | 3 | 2  | 2246,0564 | 0,0021  |
| 6  | 2 | 4  | 7  | 3 | 4  | 2245,8281 | -0,0001 |
| 7  | 2 | 5  | 8  | 3 | 5  | 2245,7139 | 0,0026  |
| 4  | 2 | 3  | 5  | 3 | 2  | 2246,0564 | 0,0020  |
| 6  | 2 | 5  | 7  | 3 | 4  | 2245,8281 | -0,0012 |
| 7  | 2 | 6  | 8  | 3 | 5  | 2245,7139 | 0,0004  |
| 11 | 2 | 10 | 12 | 3 | 9  | 2245,2158 | 0,0025  |
| 1  | 1 | 0  | 2  | 2 | 0  | 2246,8716 | 0,0002  |
| 2  | 1 | 1  | 3  | 2 | 1  | 2246,7608 | 0,0021  |
| 3  | 1 | 2  | 4  | 2 | 2  | 2246,6428 | -0,0001 |
| 4  | 1 | 3  | 5  | 2 | 3  | 2246,5227 | -0,0004 |
| 7  | 1 | 6  | 8  | 2 | 6  | 2246,1279 | -0,0016 |
| 1  | 1 | 1  | 2  | 2 | 1  | 2246,8716 | -0,0030 |
| 2  | 1 | 2  | 3  | 2 | 2  | 2246,7678 | -0,0011 |
| 3  | 1 | 3  | 4  | 2 | 3  | 2246,6624 | -0,0024 |
| 5  | 1 | 5  | 6  | 2 | 5  | 2246,4604 | -0,0002 |
| 7  | 1 | 7  | 8  | 2 | 7  | 2246,2581 | -0,0020 |
| 0  | 0 | 0  | 1  | 1 | 0  | 2247,4641 | -0,0019 |
| 2  | 0 | 2  | 3  | 1 | 2  | 2247,2212 | -0,0018 |
| 6  | 0 | 6  | 7  | 1 | 6  | 2246,6848 | -0,0007 |
| 7  | 6 | 1  | 7  | 7 | 1  | 2244,627  | -0,0007 |
| 10 | 6 | 4  | 10 | 7 | 4  | 2244,5962 | 0,0012  |
| 13 | 6 | 7  | 13 | 7 | 7  | 2244,5403 | 0,0008  |
| 14 | 6 | 8  | 14 | 7 | 8  | 2244,5154 | 0,0010  |
| 6  | 5 | 1  | 6  | 6 | 1  | 2245,1304 | 0,0015  |
| 8  | 5 | 3  | 8  | 6 | 3  | 2245,1165 | -0,0014 |
| 9  | 5 | 4  | 9  | 6 | 4  | 2245,1094 | -0,0006 |
| 10 | 5 | 5  | 10 | 6 | 5  | 2245,0991 | -0,0011 |
| 5  | 4 | 1  | 5  | 5 | 1  | 2245,6226 | -0,0015 |
| 6  | 4 | 2  | 6  | 5 | 2  | 2245,6226 | 0,0005  |
| 7  | 4 | 3  | 7  | 5 | 3  | 2245,618  | -0,0012 |
| 8  | 4 | 4  | 8  | 5 | 4  | 2245,616  | 0,0009  |
| 9  | 4 | 5  | 9  | 5 | 5  | 2245,6108 | 0,0013  |
| 10 | 4 | 6  | 10 | 5 | 6  | 2245,6016 | -0,0006 |
| 11 | 4 | 7  | 11 | 5 | 7  | 2245,5947 | 0,0021  |
| 4  | 3 | 1  | 4  | 4 | 1  | 2246,1145 | -0,0009 |
| 5  | 3 | 2  | 5  | 4 | 2  | 2246,1145 | -0,0007 |
| 6  | 3 | 3  | 6  | 4 | 3  | 2246,1145 | 0,0000  |
| 7  | 3 | 4  | 7  | 4 | 4  | 2246,1145 | 0,0015  |
| 8  | 3 | 5  | 8  | 4 | 5  | 2246,1108 | 0,0005  |
| 9  | 3 | 6  | 9  | 4 | 6  | 2246,105  | -0,0013 |
| 10 | 3 | 7  | 10 | 4 | 7  | 2246,1011 | 0,0005  |
| 11 | 3 | 8  | 11 | 4 | 8  | 2246,0925 | -0,0002 |
| 12 | 3 | 9  | 12 | 4 | 9  | 2246,0818 | -0,0007 |
| 14 | 3 | 11 | 14 | 4 | 11 | 2246,0513 | -0,0021 |
| 3  | 2 | 1  | 3  | 3 | 1  | 2246,6057 | 0,0012  |
| 4  | 2 | 2  | 4  | 3 | 2  | 2246,6057 | 0,0005  |
| 5  | 2 | 3  | 5  | 3 | 3  | 2246,6057 | 0,0001  |
| 6  | 2 | 4  | 6  | 3 | 4  | 2246,6057 | 0,0003  |
| 7  | 2 | 5  | 7  | 3 | 5  | 2246,6057 | 0,0015  |
| 8  | 2 | 6  | 8  | 3 | 6  | 2246,6017 | 0,0000  |
| 9  | 2 | 7  | 9  | 3 | 7  | 2246,5974 | 0,0000  |
| 10 | 2 | 8  | 10 | 3 | 8  | 2246,5907 | -0,0002 |
| 2  | 1 | 1  | 2  | 2 | 1  | 2247,0869 | -0,0017 |

|    |    |   |    |    |   |           |         |
|----|----|---|----|----|---|-----------|---------|
| 3  | 1  | 2 | 3  | 2  | 2 | 2247,0862 | 0,0001  |
| 2  | 0  | 2 | 2  | 1  | 2 | 2247,5999 | 0,0017  |
| 3  | 0  | 3 | 3  | 1  | 3 | 2247,6177 | 0,0018  |
| 7  | 0  | 7 | 7  | 1  | 7 | 2247,7432 | -0,0012 |
| 8  | 0  | 8 | 8  | 1  | 8 | 2247,7919 | 0,0016  |
| 3  | 3  | 1 | 3  | 2  | 1 | 2249,0535 | 0,0012  |
| 4  | 3  | 2 | 4  | 2  | 2 | 2249,05   | -0,0013 |
| 5  | 3  | 3 | 5  | 2  | 3 | 2249,0479 | 0,0000  |
| 6  | 3  | 4 | 6  | 2  | 4 | 2249,0401 | -0,0006 |
| 7  | 3  | 5 | 7  | 2  | 5 | 2249,0273 | -0,0015 |
| 8  | 3  | 6 | 8  | 2  | 6 | 2249,0098 | -0,0012 |
| 9  | 3  | 7 | 9  | 2  | 7 | 2248,9885 | 0,0017  |
| 10 | 3  | 8 | 10 | 2  | 8 | 2248,9548 | -0,0010 |
| 11 | 3  | 9 | 11 | 2  | 9 | 2248,9194 | 0,0012  |
| 3  | 3  | 0 | 3  | 3  | 1 | 2247,828  | -0,0013 |
| 4  | 3  | 1 | 4  | 3  | 2 | 2247,8303 | 0,0002  |
| 5  | 3  | 2 | 5  | 3  | 3 | 2247,8303 | -0,0005 |
| 6  | 3  | 3 | 6  | 3  | 4 | 2247,8303 | -0,0007 |
| 7  | 3  | 4 | 7  | 3  | 5 | 2247,8303 | -0,0002 |
| 8  | 3  | 5 | 8  | 3  | 6 | 2247,828  | -0,0011 |
| 3  | 3  | 1 | 3  | 3  | 0 | 2247,828  | -0,0013 |
| 4  | 3  | 2 | 4  | 3  | 1 | 2247,8303 | 0,0002  |
| 5  | 3  | 3 | 5  | 3  | 2 | 2247,8303 | -0,0002 |
| 6  | 3  | 4 | 6  | 3  | 3 | 2247,8303 | 0,0001  |
| 7  | 3  | 5 | 7  | 3  | 4 | 2247,828  | -0,0007 |
| 8  | 3  | 6 | 8  | 3  | 5 | 2247,828  | 0,0027  |
| 2  | 2  | 0 | 2  | 2  | 1 | 2247,828  | 0,0003  |
| 3  | 2  | 1 | 3  | 2  | 2 | 2247,828  | -0,0014 |
| 4  | 2  | 2 | 4  | 2  | 3 | 2247,8303 | -0,0014 |
| 5  | 2  | 3 | 5  | 2  | 4 | 2247,8323 | -0,0027 |
| 6  | 2  | 4 | 6  | 2  | 5 | 2247,8373 | -0,0018 |
| 7  | 2  | 5 | 7  | 2  | 6 | 2247,8413 | -0,0029 |
| 2  | 2  | 1 | 2  | 2  | 0 | 2247,828  | 0,0007  |
| 3  | 2  | 2 | 3  | 2  | 1 | 2247,828  | 0,0004  |
| 4  | 2  | 3 | 4  | 2  | 2 | 2247,828  | 0,0014  |
| 5  | 2  | 4 | 5  | 2  | 3 | 2247,823  | -0,0002 |
| 6  | 2  | 5 | 6  | 2  | 4 | 2247,8181 | 0,0018  |
| 1  | 1  | 1 | 1  | 1  | 0 | 2247,823  | 0,0008  |
| 2  | 1  | 2 | 2  | 1  | 1 | 2247,8181 | 0,0025  |
| 3  | 1  | 3 | 3  | 1  | 2 | 2247,8071 | 0,0012  |
| 4  | 1  | 4 | 4  | 1  | 3 | 2247,7939 | 0,0008  |
| 5  | 1  | 5 | 5  | 1  | 4 | 2247,7798 | 0,0024  |
| 6  | 1  | 6 | 6  | 1  | 5 | 2247,7595 | 0,0006  |
| 1  | 1  | 0 | 1  | 1  | 1 | 2247,828  | -0,0019 |
| 2  | 1  | 1 | 2  | 1  | 2 | 2247,8372 | -0,0018 |
| 3  | 1  | 2 | 3  | 1  | 3 | 2247,8516 | -0,0012 |
| 4  | 1  | 3 | 4  | 1  | 4 | 2247,8706 | -0,0008 |
| 5  | 1  | 4 | 5  | 1  | 5 | 2247,895  | -0,0002 |
| 11 | 11 | 1 | 12 | 11 | 2 | 2246,2571 | 0,0008  |
| 10 | 10 | 1 | 11 | 10 | 2 | 2246,4495 | 0,0003  |
| 12 | 10 | 3 | 13 | 10 | 4 | 2246,1438 | 0,0008  |
| 13 | 10 | 4 | 14 | 10 | 5 | 2245,9797 | -0,0013 |
| 14 | 10 | 5 | 15 | 10 | 6 | 2245,8125 | 0,0000  |
| 10 | 10 | 0 | 11 | 10 | 1 | 2246,4495 | 0,0003  |
| 12 | 10 | 2 | 13 | 10 | 3 | 2246,1438 | 0,0008  |
| 13 | 10 | 3 | 14 | 10 | 4 | 2245,9797 | -0,0013 |
| 14 | 10 | 4 | 15 | 10 | 5 | 2245,8125 | 0,0000  |
| 9  | 9  | 1 | 10 | 9  | 2 | 2246,6216 | 0,0009  |
| 10 | 9  | 2 | 11 | 9  | 3 | 2246,4805 | -0,0005 |



|    |   |   |    |   |   |           |         |
|----|---|---|----|---|---|-----------|---------|
| 11 | 9 | 3 | 12 | 9 | 4 | 2246,336  | -0,0007 |
| 13 | 9 | 5 | 14 | 9 | 6 | 2246,0322 | 0,0002  |
| 14 | 9 | 6 | 15 | 9 | 7 | 2245,8728 | 0,0020  |
| 9  | 9 | 0 | 10 | 9 | 1 | 2246,6216 | 0,0009  |
| 10 | 9 | 1 | 11 | 9 | 2 | 2246,4805 | -0,0005 |
| 11 | 9 | 2 | 12 | 9 | 3 | 2246,336  | -0,0007 |
| 13 | 9 | 4 | 14 | 9 | 5 | 2246,0322 | 0,0002  |
| 14 | 9 | 5 | 15 | 9 | 6 | 2245,8728 | 0,0020  |
| 8  | 8 | 1 | 9  | 8 | 2 | 2246,7749 | 0,0003  |
| 9  | 8 | 2 | 10 | 8 | 3 | 2246,6428 | -0,0008 |
| 10 | 8 | 3 | 11 | 8 | 4 | 2246,5081 | -0,0006 |
| 12 | 8 | 5 | 13 | 8 | 6 | 2246,2244 | -0,0013 |
| 8  | 8 | 0 | 9  | 8 | 1 | 2246,7749 | 0,0003  |
| 9  | 8 | 1 | 10 | 8 | 2 | 2246,6428 | -0,0008 |
| 10 | 8 | 2 | 11 | 8 | 3 | 2246,5081 | -0,0006 |
| 12 | 8 | 4 | 13 | 8 | 5 | 2246,2278 | 0,0021  |
| 9  | 7 | 3 | 10 | 7 | 4 | 2246,6624 | -0,0007 |
| 10 | 7 | 4 | 11 | 7 | 5 | 2246,5334 | 0,0010  |
| 12 | 7 | 6 | 13 | 7 | 7 | 2246,2581 | -0,0005 |
| 13 | 7 | 7 | 14 | 7 | 8 | 2246,1145 | -0,0001 |
| 9  | 7 | 2 | 10 | 7 | 3 | 2246,6624 | -0,0007 |
| 10 | 7 | 3 | 11 | 7 | 4 | 2246,5334 | 0,0010  |
| 12 | 7 | 5 | 13 | 7 | 6 | 2246,2581 | -0,0005 |
| 13 | 7 | 6 | 14 | 7 | 7 | 2246,1145 | -0,0001 |
| 6  | 6 | 1 | 7  | 6 | 2 | 2247,0413 | -0,0019 |
| 7  | 6 | 2 | 8  | 6 | 3 | 2246,9224 | -0,0021 |
| 8  | 6 | 3 | 9  | 6 | 4 | 2246,8044 | 0,0011  |
| 9  | 6 | 4 | 10 | 6 | 5 | 2246,6804 | 0,0011  |
| 11 | 6 | 6 | 12 | 6 | 7 | 2246,4221 | 0,0012  |
| 6  | 6 | 0 | 7  | 6 | 1 | 2247,0413 | -0,0019 |
| 7  | 6 | 1 | 8  | 6 | 2 | 2246,9224 | -0,0021 |
| 8  | 6 | 2 | 9  | 6 | 3 | 2246,8044 | 0,0011  |
| 9  | 6 | 3 | 10 | 6 | 4 | 2246,6804 | 0,0011  |
| 11 | 6 | 5 | 12 | 6 | 6 | 2246,4221 | 0,0013  |
| 6  | 5 | 2 | 7  | 5 | 3 | 2247,0481 | -0,0010 |
| 7  | 5 | 3 | 8  | 5 | 4 | 2246,9307 | -0,0017 |
| 8  | 5 | 4 | 9  | 5 | 5 | 2246,8142 | 0,0008  |
| 11 | 5 | 7 | 12 | 5 | 8 | 2246,4382 | -0,0002 |
| 6  | 5 | 1 | 7  | 5 | 2 | 2247,0481 | -0,0010 |
| 7  | 5 | 2 | 8  | 5 | 3 | 2246,9307 | -0,0017 |
| 8  | 5 | 3 | 9  | 5 | 4 | 2246,8142 | 0,0008  |
| 11 | 5 | 6 | 12 | 5 | 7 | 2246,4382 | -0,0002 |
| 4  | 4 | 1 | 5  | 4 | 2 | 2247,2773 | -0,0013 |
| 6  | 4 | 3 | 7  | 4 | 4 | 2247,0535 | 0,0004  |
| 7  | 4 | 4 | 8  | 4 | 5 | 2246,9385 | 0,0007  |
| 10 | 4 | 7 | 11 | 4 | 8 | 2246,5774 | 0,0009  |
| 4  | 4 | 0 | 5  | 4 | 1 | 2247,2773 | -0,0013 |
| 6  | 4 | 2 | 7  | 4 | 3 | 2247,0535 | 0,0004  |
| 7  | 4 | 3 | 8  | 4 | 4 | 2246,9385 | 0,0007  |
| 9  | 4 | 5 | 10 | 4 | 6 | 2246,7034 | 0,0039  |
| 10 | 4 | 6 | 11 | 4 | 7 | 2246,5774 | 0,0018  |
| 4  | 3 | 2 | 5  | 3 | 3 | 2247,2808 | 0,0014  |
| 6  | 3 | 4 | 7  | 3 | 5 | 2247,0535 | -0,0019 |
| 7  | 3 | 5 | 8  | 3 | 6 | 2246,9421 | 0,0011  |
| 9  | 3 | 7 | 10 | 3 | 8 | 2246,7039 | -0,0019 |
| 10 | 3 | 8 | 11 | 3 | 9 | 2246,5828 | -0,0016 |
| 4  | 3 | 1 | 5  | 3 | 2 | 2247,2808 | 0,0016  |
| 6  | 3 | 3 | 7  | 3 | 4 | 2247,0535 | -0,0003 |
| 7  | 3 | 4 | 8  | 3 | 5 | 2246,9385 | 0,0009  |

|    |   |    |    |   |   |           |         |
|----|---|----|----|---|---|-----------|---------|
| 9  | 3 | 6  | 10 | 3 | 7 | 2246,696  | 0,0018  |
| 2  | 1 | 2  | 1  | 1 | 1 | 2248,054  | -0,0012 |
| 10 | 7 | 3  | 9  | 7 | 2 | 2248,9126 | -0,0007 |
| 11 | 7 | 4  | 10 | 7 | 3 | 2249,0176 | 0,0003  |
| 12 | 7 | 5  | 11 | 7 | 4 | 2249,1214 | 0,0013  |
| 15 | 7 | 8  | 14 | 7 | 7 | 2249,4226 | 0,0037  |
| 10 | 7 | 4  | 9  | 7 | 3 | 2248,9126 | -0,0007 |
| 11 | 7 | 5  | 10 | 7 | 4 | 2249,0176 | 0,0003  |
| 12 | 7 | 6  | 11 | 7 | 5 | 2249,1214 | 0,0013  |
| 15 | 7 | 9  | 14 | 7 | 8 | 2249,4226 | 0,0037  |
| 10 | 8 | 2  | 9  | 8 | 1 | 2248,9001 | 0,0006  |
| 11 | 8 | 3  | 10 | 8 | 2 | 2249,0015 | 0,0016  |
| 12 | 8 | 4  | 11 | 8 | 3 | 2249,0979 | -0,0008 |
| 13 | 8 | 5  | 12 | 8 | 4 | 2249,1945 | -0,0013 |
| 15 | 8 | 7  | 14 | 8 | 6 | 2249,3837 | -0,0001 |
| 16 | 8 | 8  | 15 | 8 | 7 | 2249,4763 | 0,0020  |
| 17 | 8 | 9  | 16 | 8 | 8 | 2249,5643 | 0,0023  |
| 10 | 8 | 3  | 9  | 8 | 2 | 2248,9001 | 0,0006  |
| 11 | 8 | 4  | 10 | 8 | 3 | 2249,0015 | 0,0016  |
| 12 | 8 | 5  | 11 | 8 | 4 | 2249,0979 | -0,0008 |
| 13 | 8 | 6  | 12 | 8 | 5 | 2249,1945 | -0,0013 |
| 15 | 8 | 8  | 14 | 8 | 7 | 2249,3833 | -0,0005 |
| 16 | 8 | 9  | 15 | 8 | 8 | 2249,4763 | 0,0020  |
| 17 | 8 | 10 | 16 | 8 | 9 | 2249,5643 | 0,0023  |
| 10 | 9 | 1  | 9  | 9 | 0 | 2248,8843 | 0,0011  |
| 11 | 9 | 2  | 10 | 9 | 1 | 2248,9792 | -0,0002 |
| 12 | 9 | 3  | 11 | 9 | 2 | 2249,075  | 0,0013  |
| 10 | 9 | 2  | 9  | 9 | 1 | 2248,8843 | 0,0011  |
| 11 | 9 | 3  | 10 | 9 | 2 | 2248,9792 | -0,0002 |
| 12 | 9 | 4  | 11 | 9 | 3 | 2249,075  | 0,0013  |
| 4  | 2 | 2  | 5  | 2 | 3 | 2247,2726 | 0,0010  |
| 5  | 2 | 3  | 6  | 2 | 4 | 2247,1526 | -0,0002 |
| 8  | 2 | 6  | 9  | 2 | 7 | 2246,7568 | -0,0013 |
| 4  | 2 | 3  | 5  | 2 | 4 | 2247,2839 | -0,0001 |
| 2  | 1 | 1  | 3  | 1 | 2 | 2247,4653 | 0,0016  |
| 3  | 1 | 2  | 4  | 1 | 3 | 2247,332  | 0,0006  |
| 4  | 1 | 3  | 5  | 1 | 4 | 2247,1975 | 0,0036  |
| 5  | 1 | 4  | 6  | 1 | 5 | 2247,0535 | 0,0017  |
| 7  | 1 | 6  | 8  | 1 | 7 | 2246,7568 | -0,0006 |
| 3  | 1 | 3  | 4  | 1 | 4 | 2247,4505 | -0,0024 |
| 4  | 1 | 4  | 5  | 1 | 5 | 2247,3752 | -0,0016 |
